# Supplementary material for: Synthesis of cyclic monothiocarbonates via the coupling reaction of carbonyl sulfide (COS) with epoxides
Source: Royal Society of Chemistry journal article supplement (doi:10.1039/c5cy00977d), 2015-08-17
Supplement: c5cy00977d1.pdf [file c5cy00977d1.pdf]

Supporting Information for

**Synthesis of Cyclic Monothiocarbonates via the Coupling of  
Carbonyl Sulfide (COS) with Epoxides**

Figures

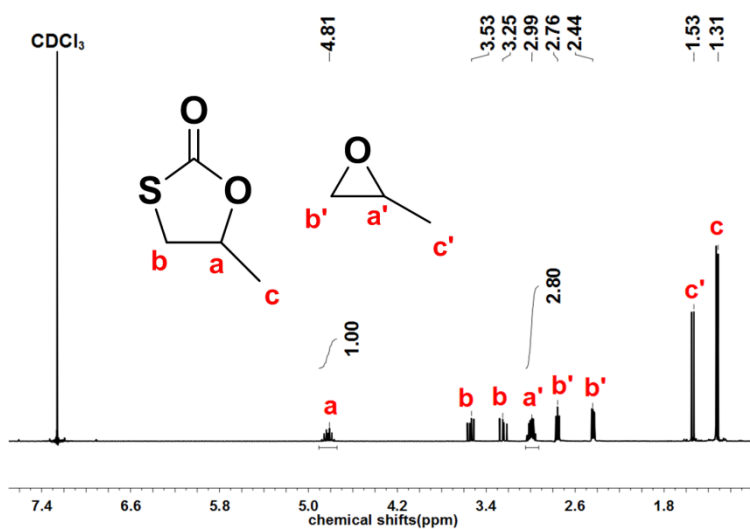

Figure S1. <sup>1</sup>H NMR spectrum of the crude product of entry 1 in Table 1.

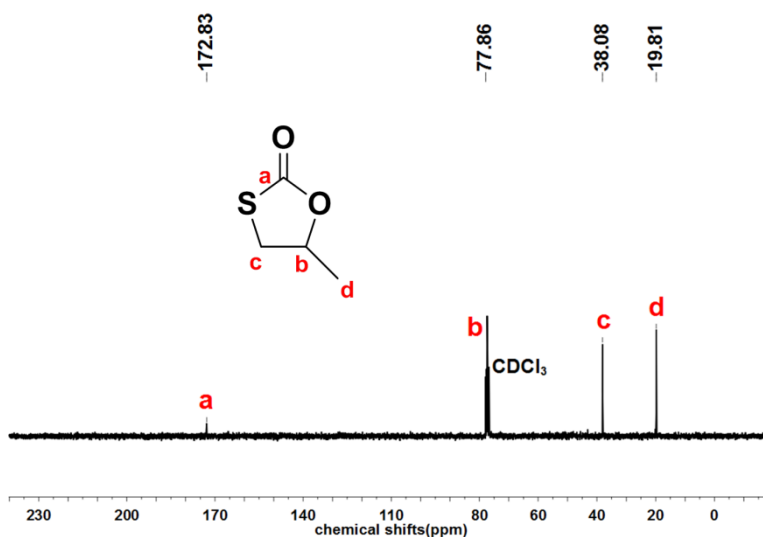

Figure S2. <sup>13</sup>C NMR spectrum of compound 2a of entry 1 in Table 1.

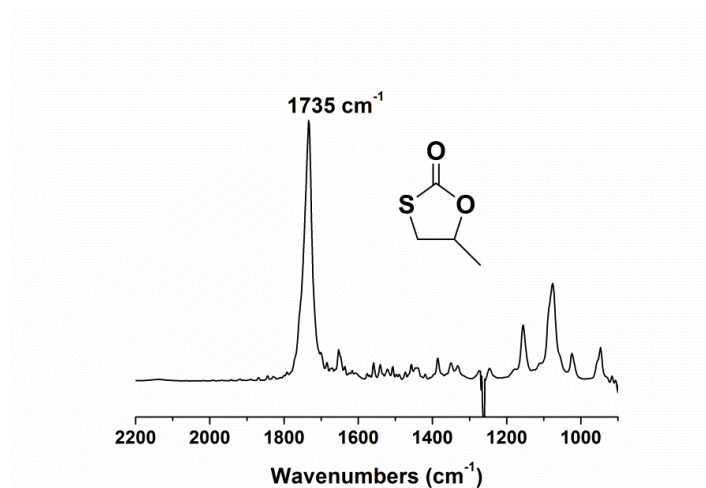

Figure S3. FT-IR spectrum of compound 2a of entry 1 in Table 1.

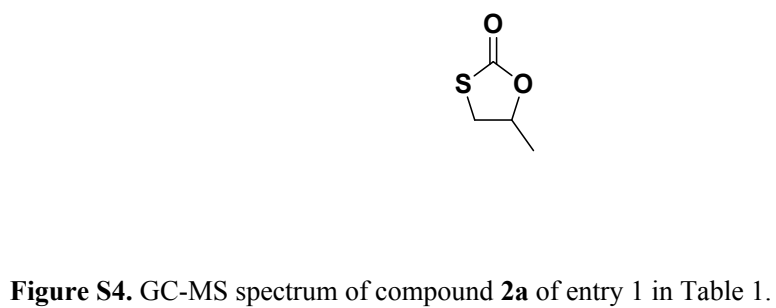

Figure S4. GC-MS spectrum of compound 2a of entry 1 in Table 1.

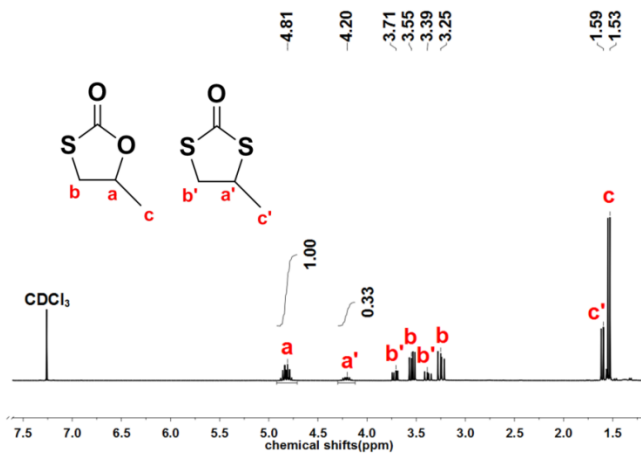

Figure S5. 1H NMR spectrum of the crude product of entry 2 in Table 1.

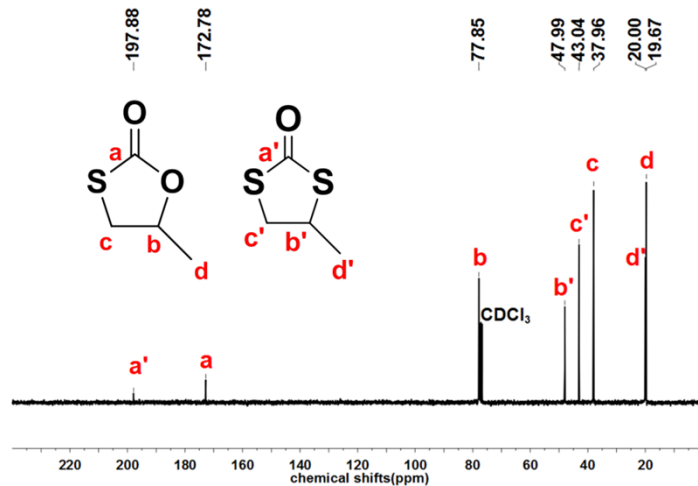

Figure S6.  $^{13}\text{C}$  NMR spectrum of the crude product of entry 2 in Table 1.

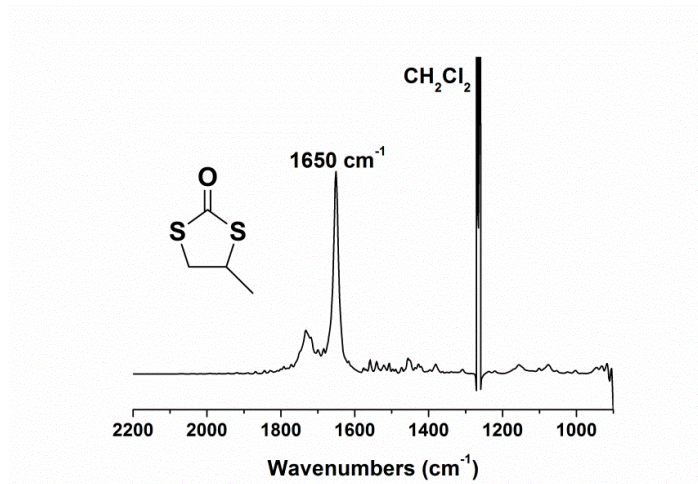

Figure S7. FT-IR spectrum of compound **3a** in Table 1.

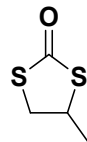

Figure S8. GC-MS spectrum of compound **3a** in Table 1.

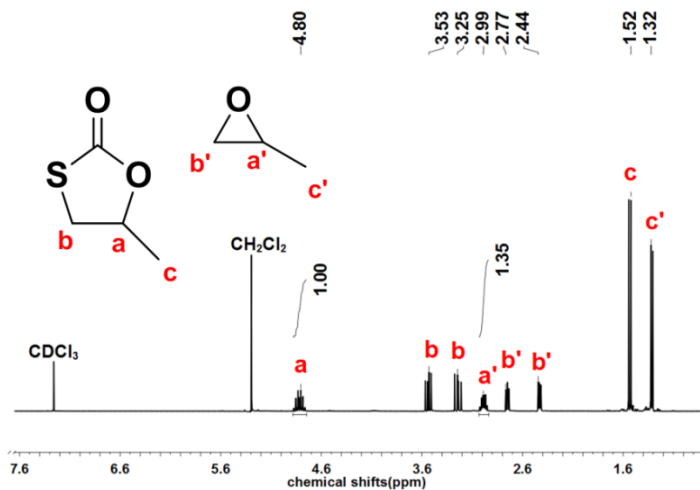

Figure S9. <sup>1</sup>H NMR spectrum of the crude product of entry 6 in Table 1.

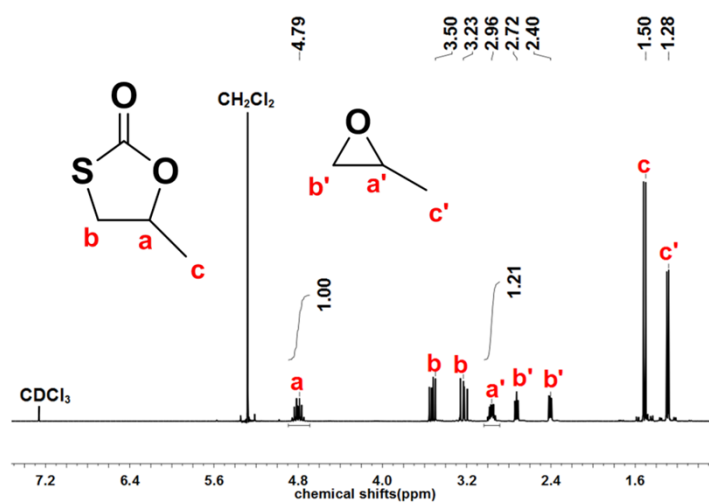

Figure S10. <sup>1</sup>H NMR spectrum of the crude product of entry 7 in Table 1.

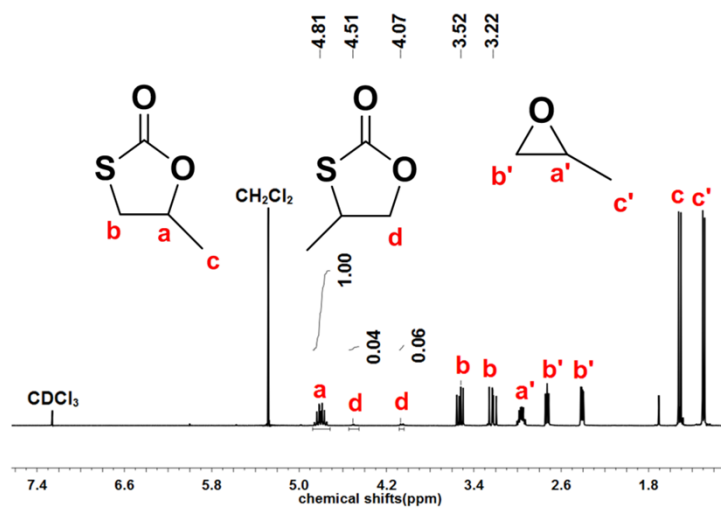

Figure S11. <sup>1</sup>H NMR spectrum of the crude product of entry 8 in Table 1.

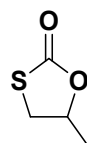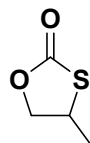

**Figure S12.** GC-MS spectrum of the crude product (compound **2a** and **4a**) of entry 8 in Table 1.

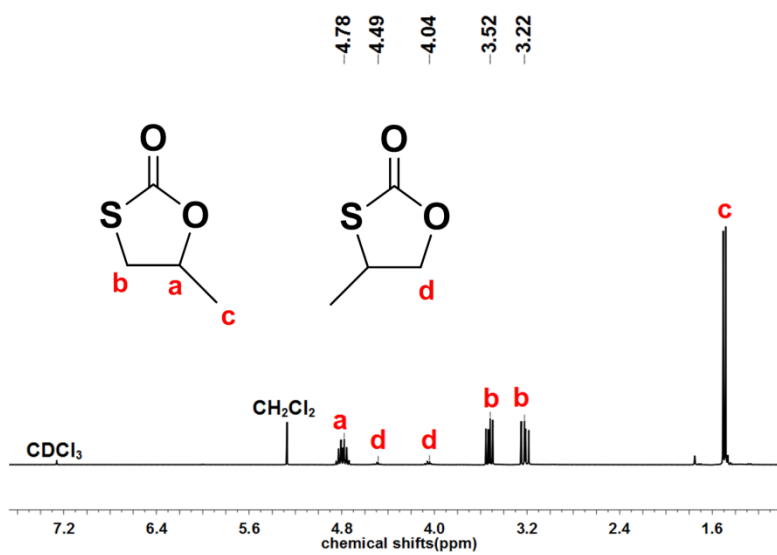

**Figure S13.** <sup>1</sup>H NMR spectrum of the crude product of entry 9 in Table 1.

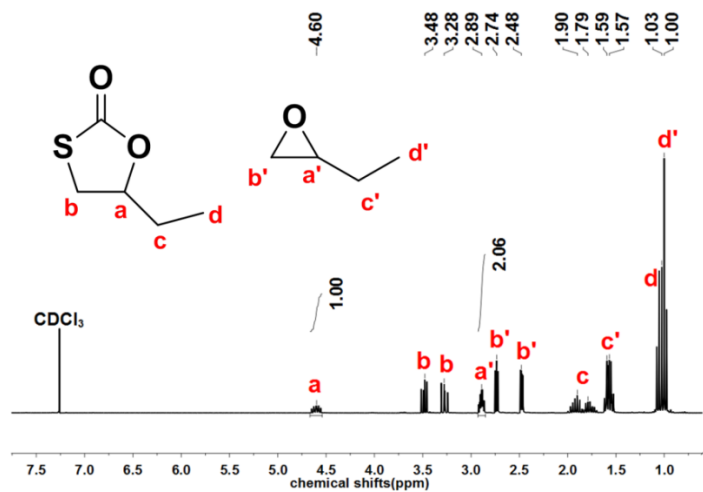

Figure S14.  $^1\text{H}$  NMR spectrum of the crude product of entry 1 in Table 2.

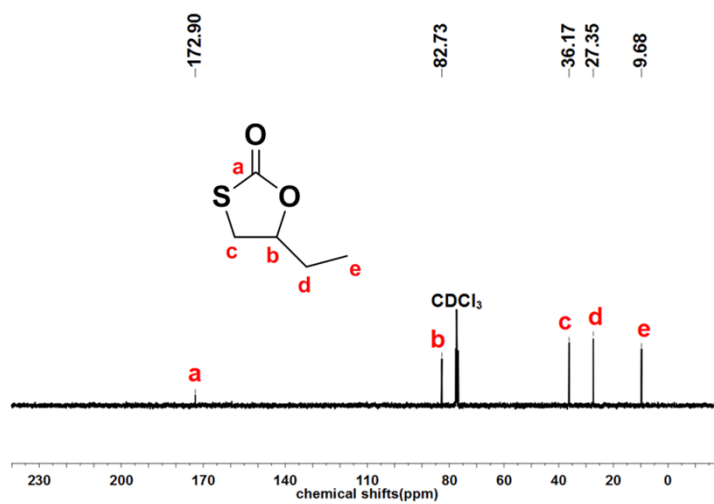

Figure S15.  $^{13}\text{C}$  NMR spectrum of compound **2b** of entry 1 in Table 2.

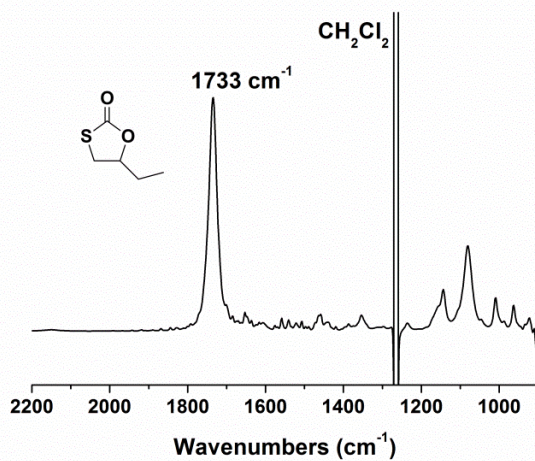

Figure S16. FT-IR spectrum of compound **2b** of entry 1 in Table 2.

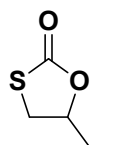

Figure S17. GC-MS spectrum of compound **2b** of entry 1 in Table 2.

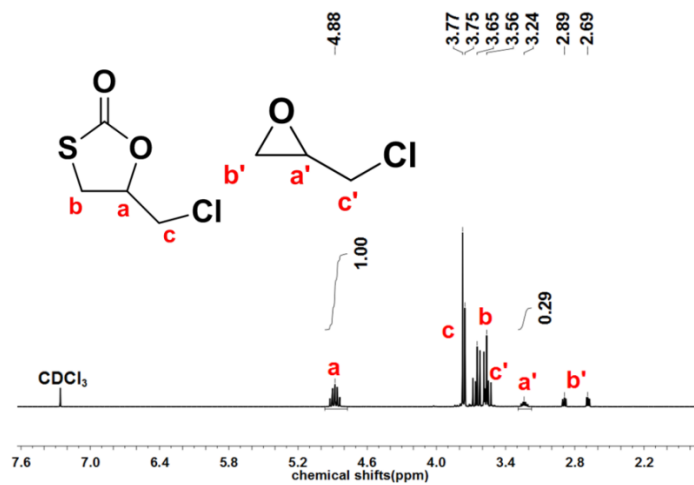

Figure S18.  $^1\text{H}$  NMR spectrum of the crude product of entry 5 in Table 2.

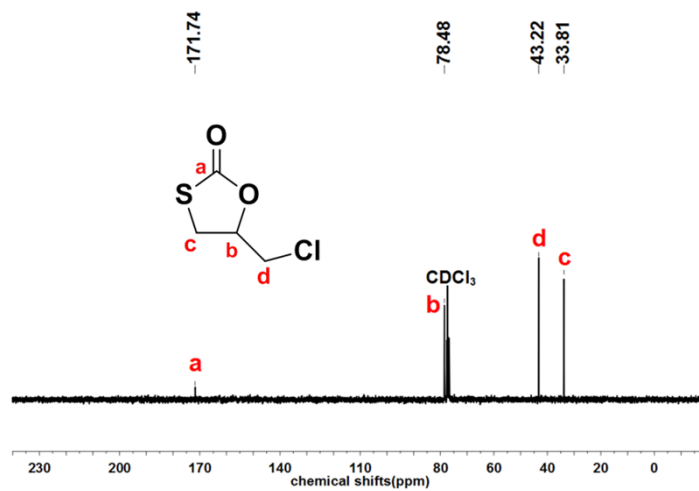

Figure S19.  $^{13}\text{C}$  NMR spectrum of compound **2c** of entry 5 in Table 2.

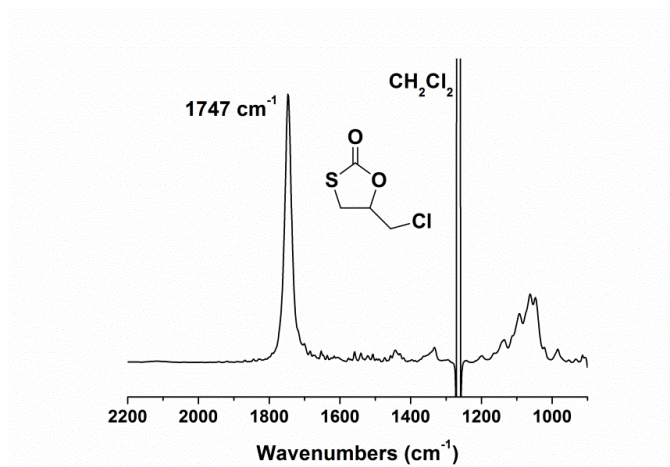

Figure S20. FT-IR spectrum of compound 2c of entry 5 in Table 2.

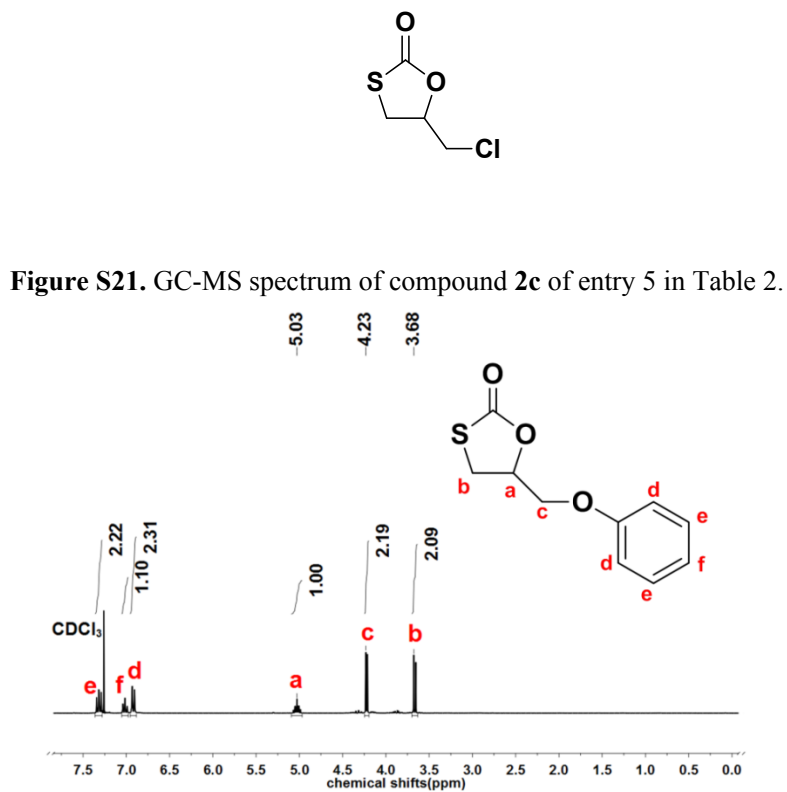

Figure S22. <sup>1</sup>H NMR spectrum of the crude product of entry 6 in Table 2.



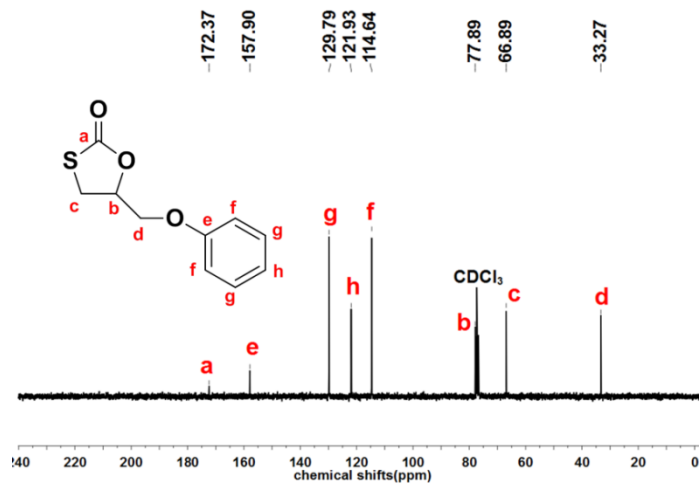

**Figure S23.**  $^{13}\text{C}$  NMR spectrum of compound **2d** of entry 6 in Table 2.

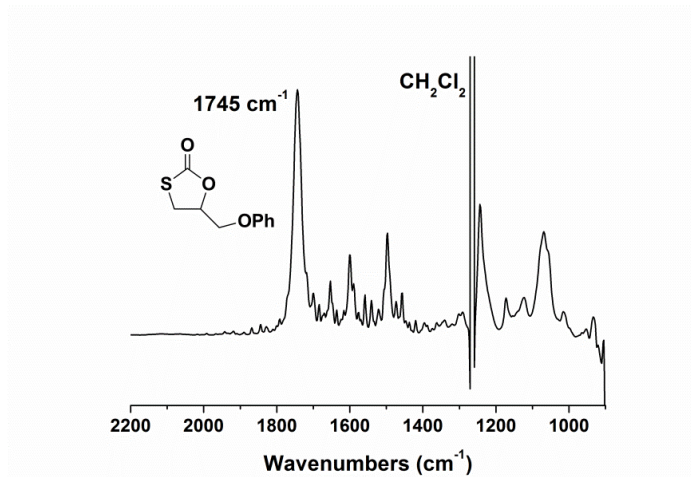

**Figure S24.** NMRFT-IR spectrum of compound **2d** of entry 6 in Table 2.

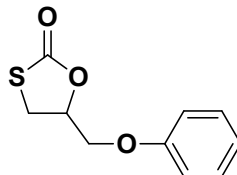

**Figure S25.** GC-MS spectrum of compound **2d** of entry 6 in Table 2.

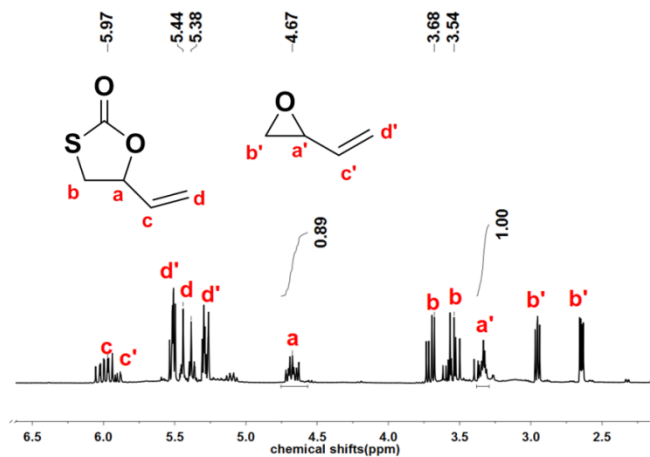

Figure S26.  $^1\text{H}$  NMR spectrum of the crude product of entry 8 in Table 2.

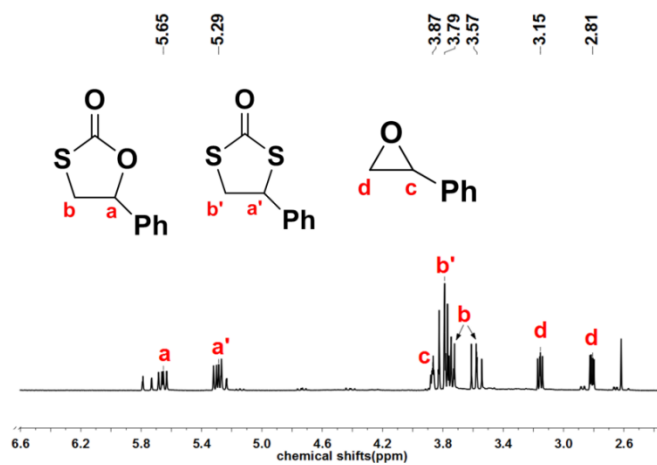

Figure S27.  $^1\text{H}$  NMR spectrum of the crude product of entry 10 in Table 2.

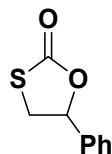

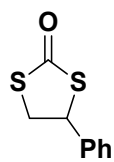

**Figure S28.** The GC-MS spectrum of compound **2f** and **3f** of entry 10 in Table 2.

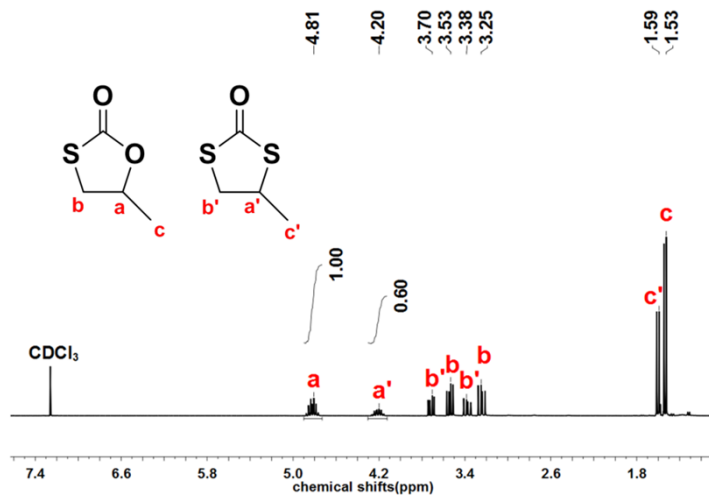

**Figure S29.**  $^1\text{H}$  NMR spectrum of the crude product of entry 3 in Table 1.

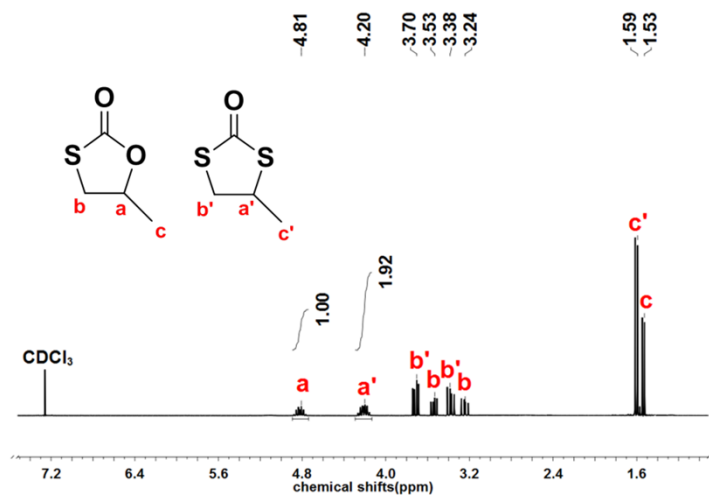

**Figure S30.**  $^1\text{H}$  NMR spectrum of the crude product of entry 4 in Table 1.

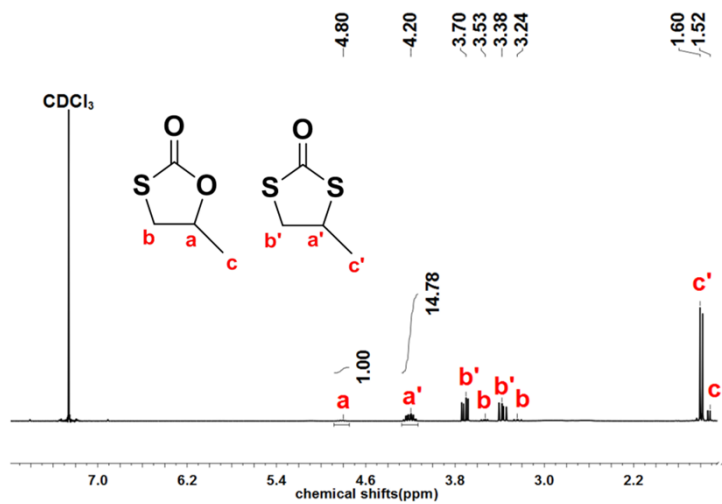

Figure S31. <sup>1</sup>H NMR spectrum of the crude product of entry 5 in Table 1.

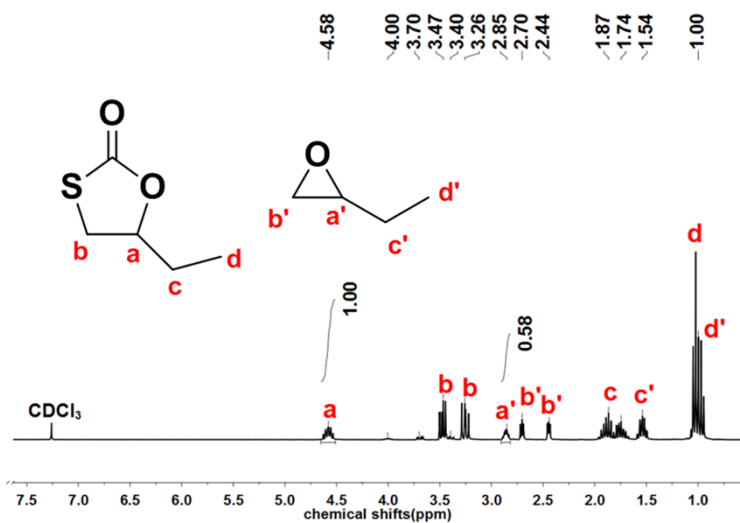

Figure S32. <sup>1</sup>H NMR spectrum of the crude product of entry 2 in Table 2.

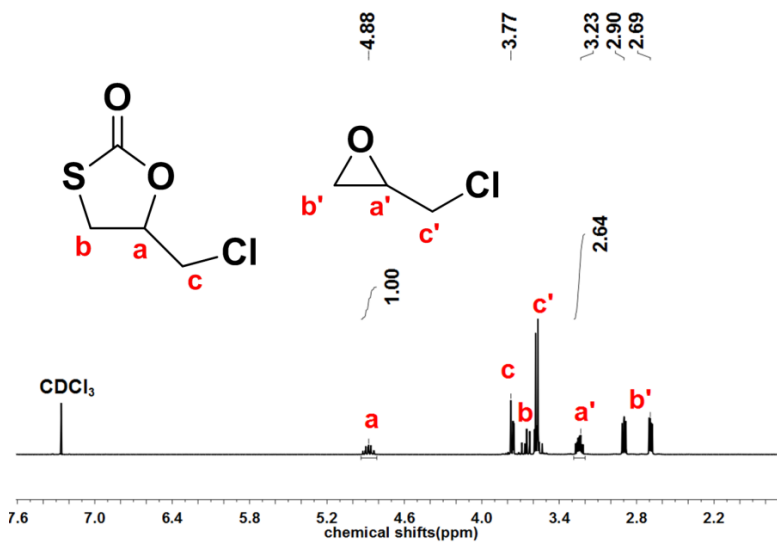

Figure S33.  $^1\text{H}$  NMR spectrum of the crude product of entry 3 in Table 2.

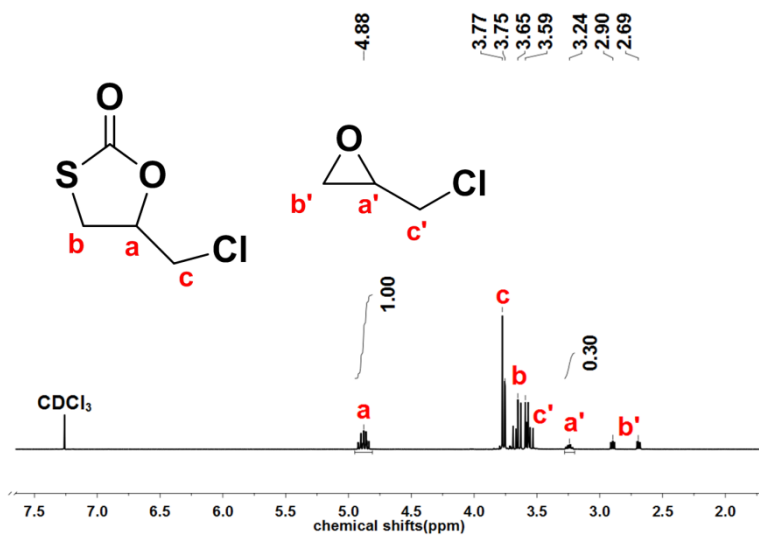

Figure S34.  $^1\text{H}$  NMR spectrum of the crude product of entry 4 in Table 2.
